# Supplementary material
Source: PubMed Central journal article supplement (PMC3400429)
Supplement: NIHMS390498-supplement-Supplementary_materials_including_Tables_S1__S5__and_Figures_S1-S6.pdf [file NIHMS390498-supplement-Supplementary_materials_including_Tables_S1__S5__and_Figures_S1-S6.pdf]

## Supplementary Tables

**Supplementary Table 1: Summary of substitutions overlapping with known SNPs, or predicted SNPs or RNA editing sites.**

| <b>Datasets</b> | <b>Total</b> | <b>Overlapping with known SNPs</b> | <b>Overlapping with predicted SNPs/editing sites</b> | <b>Other</b>      |
|-----------------|--------------|------------------------------------|------------------------------------------------------|-------------------|
| Nova CLIP       | 1,752,573    | 83,993 (4.8%)                      | 40,171 (2.3%)                                        | 1,628,409 (92.9%) |
| Ago mRNA CLIP   | 917,585      | 39,494 (4.3%)                      | 8,123 (0.9%)                                         | 869,968 (94.8%)   |

Supplementary Tables 2-4 are available in separate spread sheets.

**Supplementary Table 5: Summary of seed matches for the top 4 miRNAs identified from sequences around CIMS or cluster peaks.**

| <b>mi-RNA (seed match)</b> | <b>CIMS<br/>[-10,+10]</b> | <b>Cluster peak<br/>[-10,+10]</b> |
|----------------------------|---------------------------|-----------------------------------|
| miR-124 (UGCCUU)           | 100                       | 50                                |
| miR-9 (CCAAAG)             | 60                        | 21                                |
| let-7 (UACCUC)             | 26                        | 19                                |
| miR-26 (ACUUGA)            | 28                        | 5                                 |

## Supplementary Figures

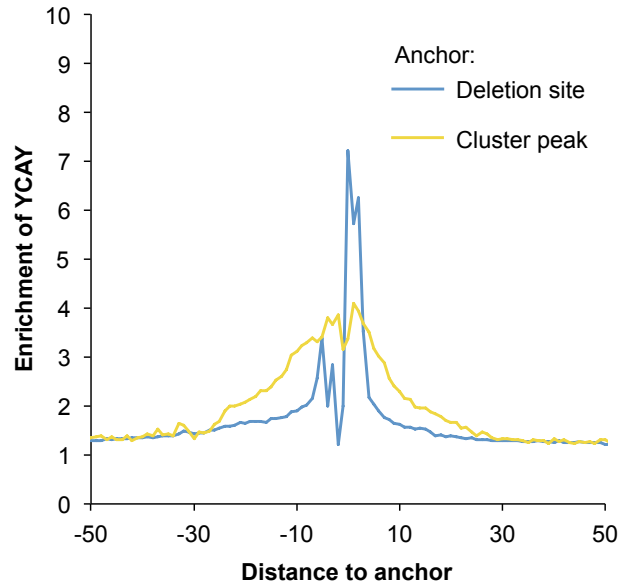

**Supplementary Figure 1: CIMS analysis precisely maps Nova binding sites.** Similar to Fig. 2c in the main text, but the enrichment of YCAY elements is shown for sequences around low-stringency CIMS with  $m=1$  and those around the corresponding CLIP tag cluster peaks. Motif frequency is normalized using background sequences 500 nt away from CIMS.

**a** *Epha5*

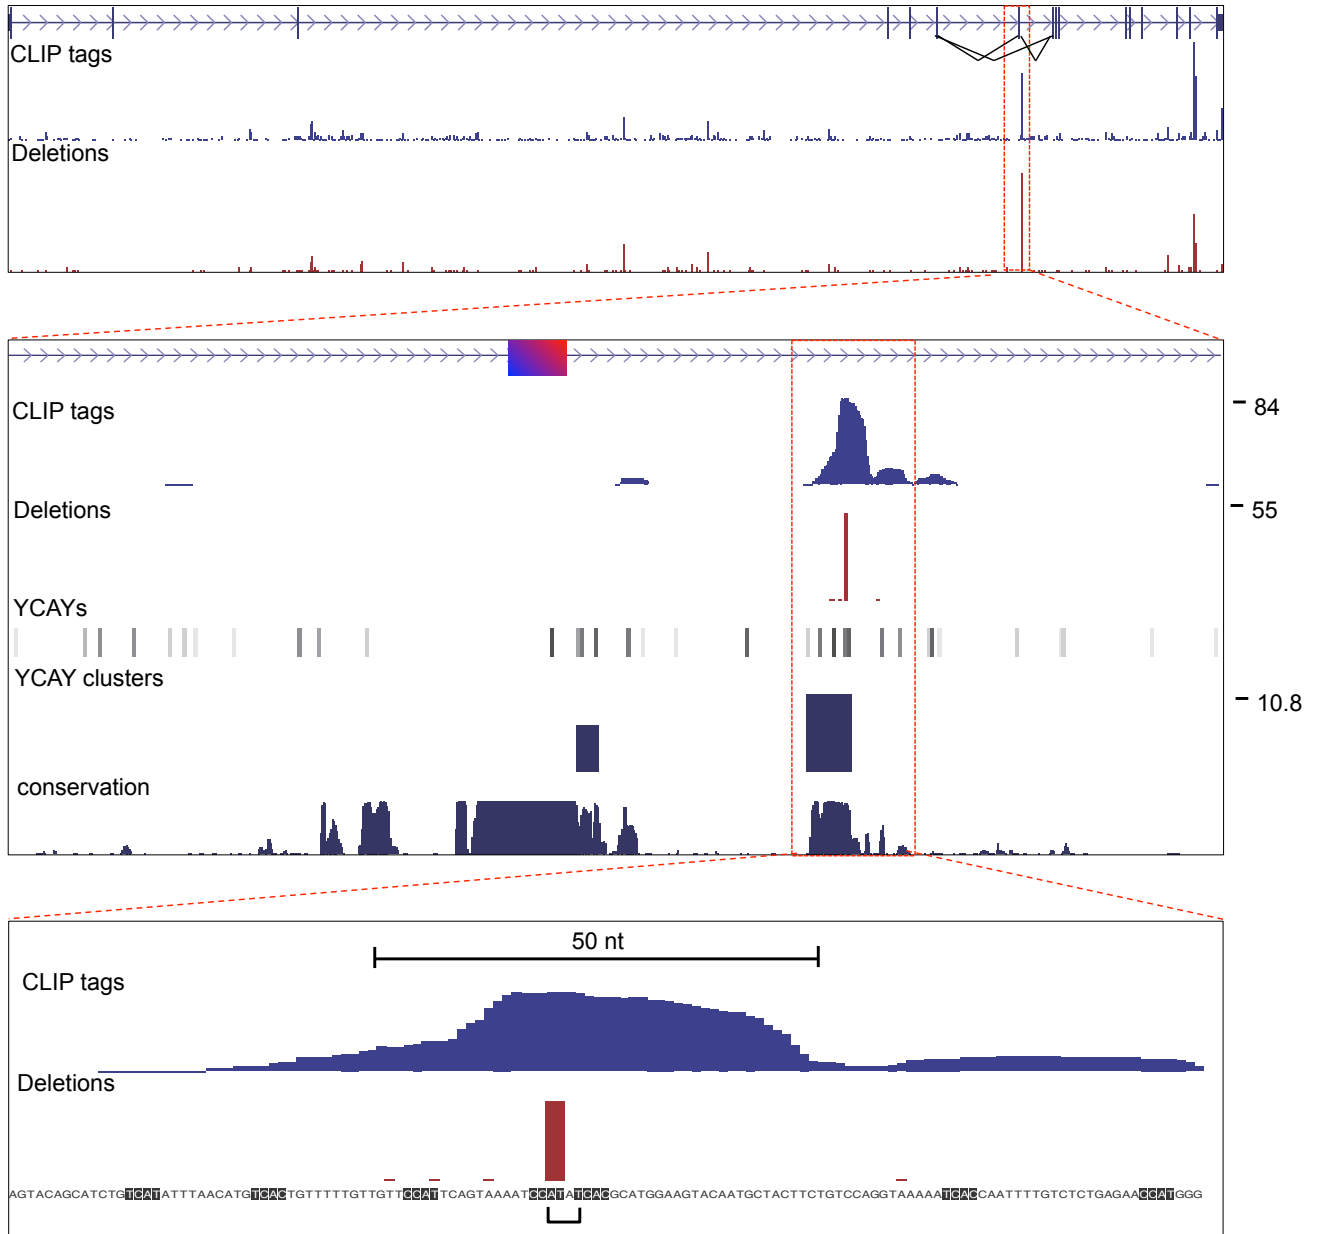

**Supplementary Figure 2: Additional examples of Nova CIMS nearby validated Nova-regulated alternative exons.**

See Fig. 3d legends in the main text for more details.

**b** *Tom112*

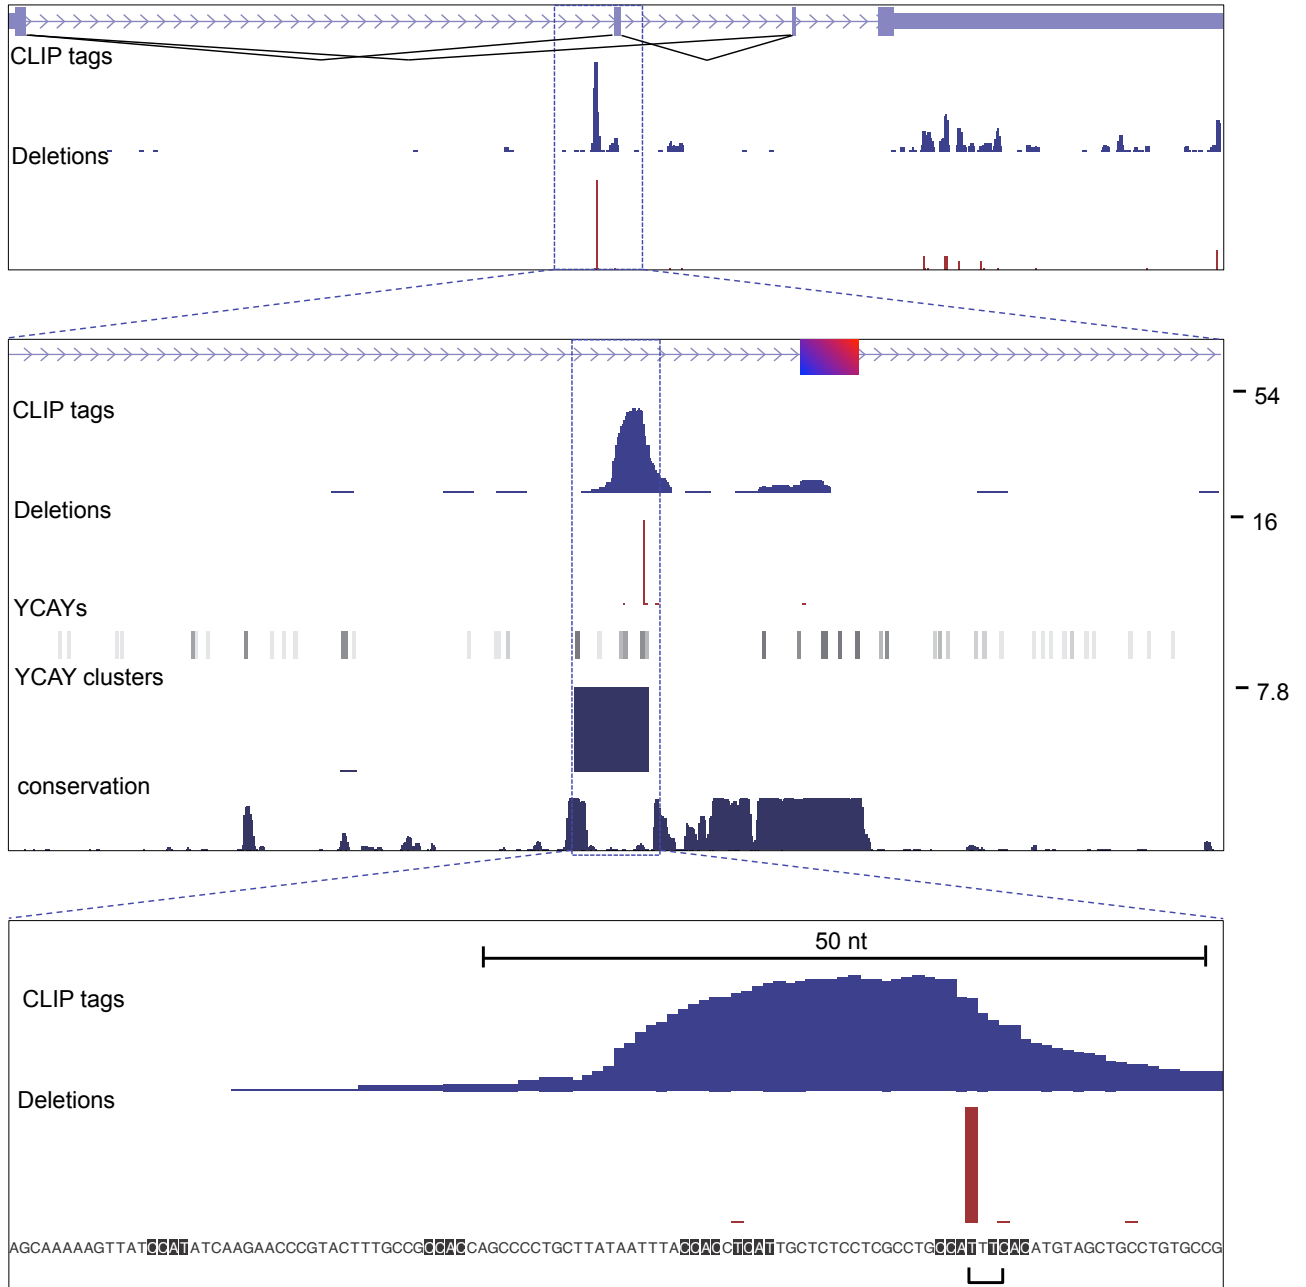

**Supplementary Figure 2: Additional examples of Nova CIMS nearby validated Nova-regulated alternative exons (continued).**  
See Fig. 3d legends in the main text for more details.

**C** *Plcb4*

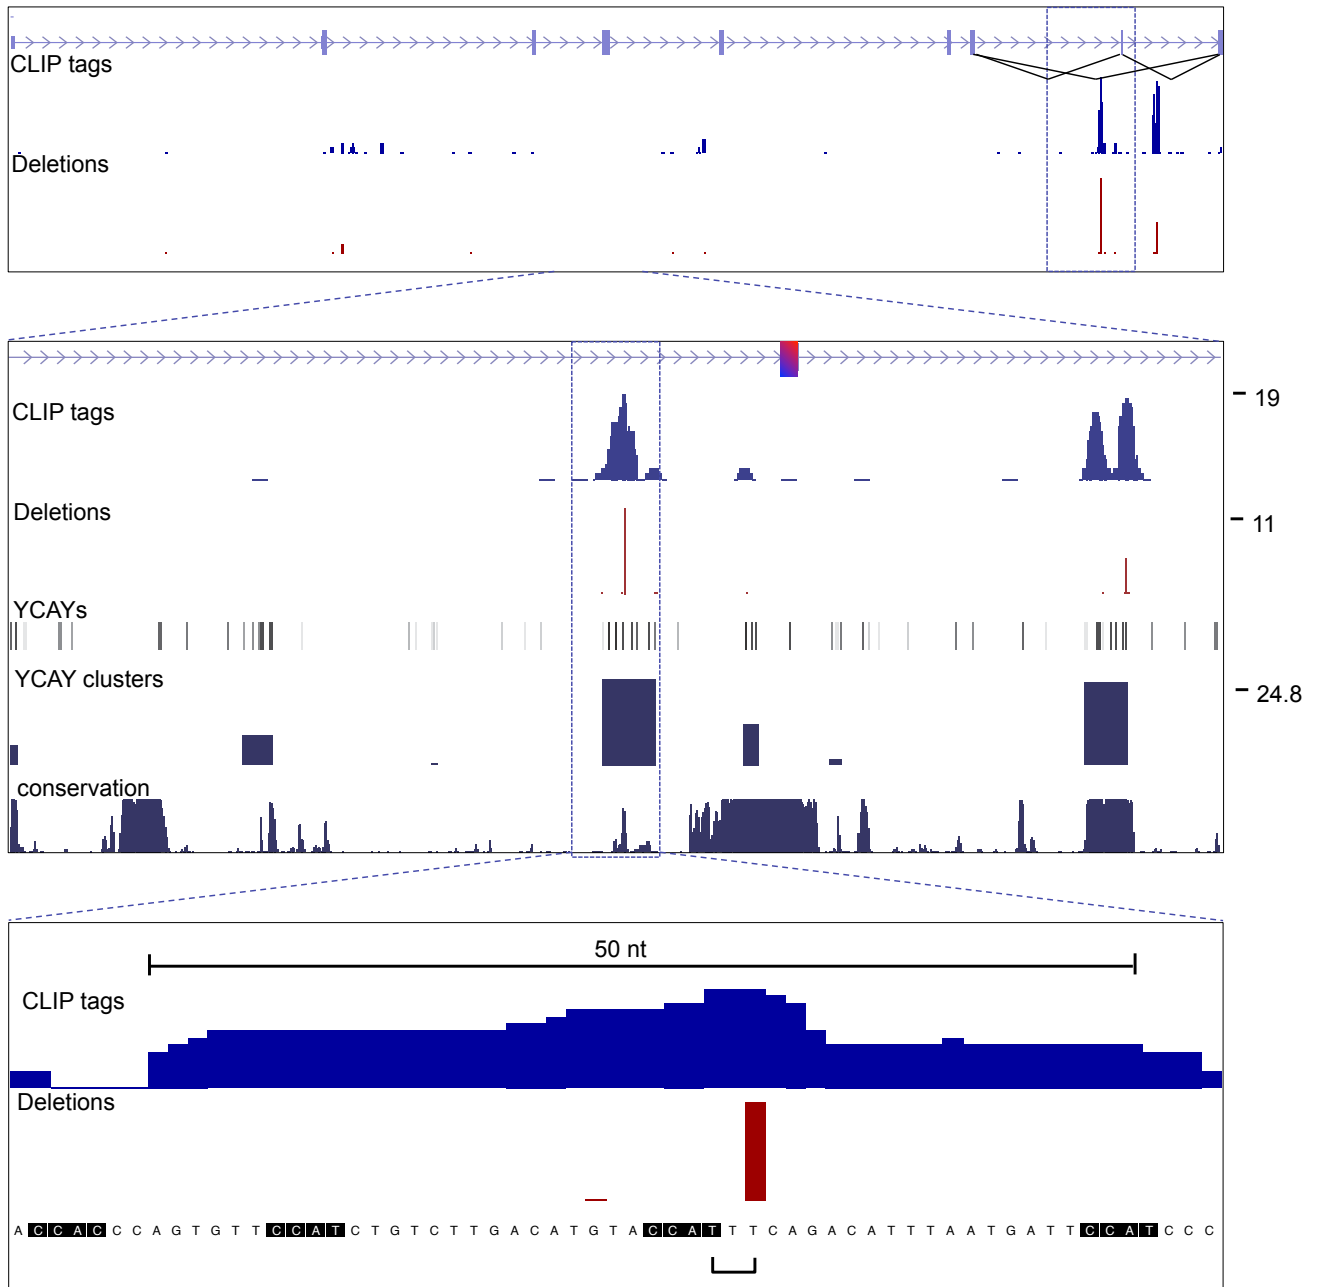

**Supplementary Figure 2: Additional examples of Nova CIMS nearby validated Nova-regulated alternative exons (continued).**

See Fig. 3d legends in the main text for more details.

**d** *Dclk1*

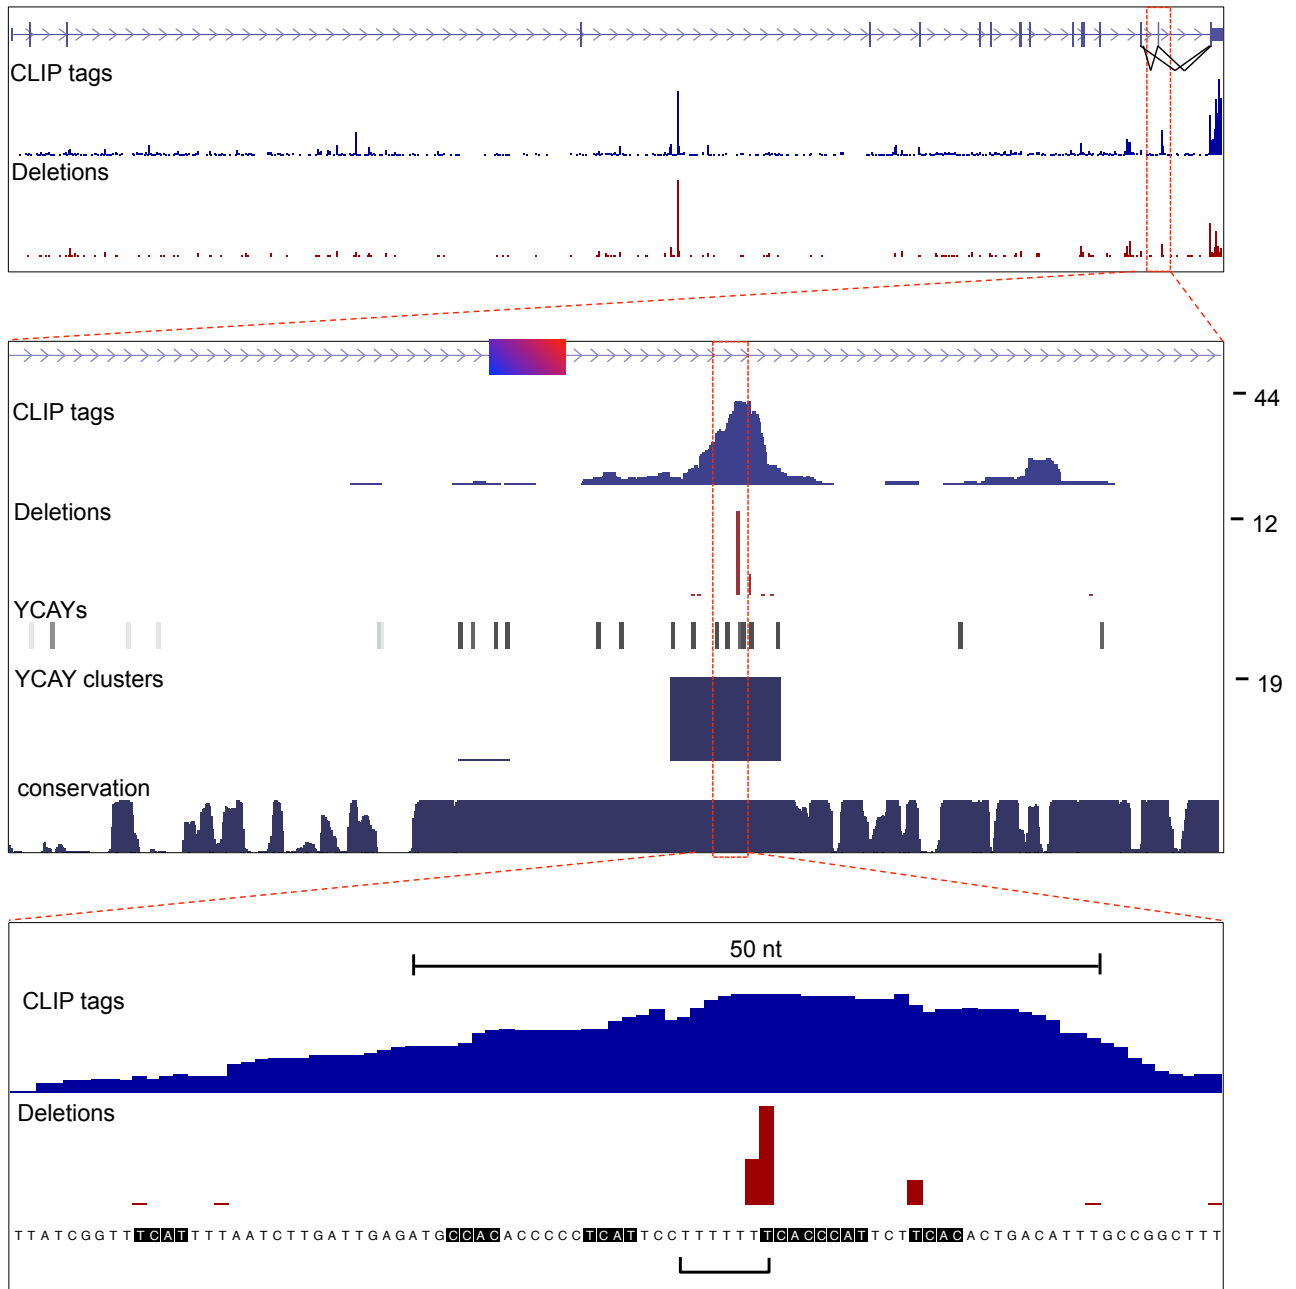

**Supplementary Figure 2: Additional examples of Nova CIMS nearby validated Nova-regulated alternative exons (continued).**

See Fig. 3d legends in the main text for more details.





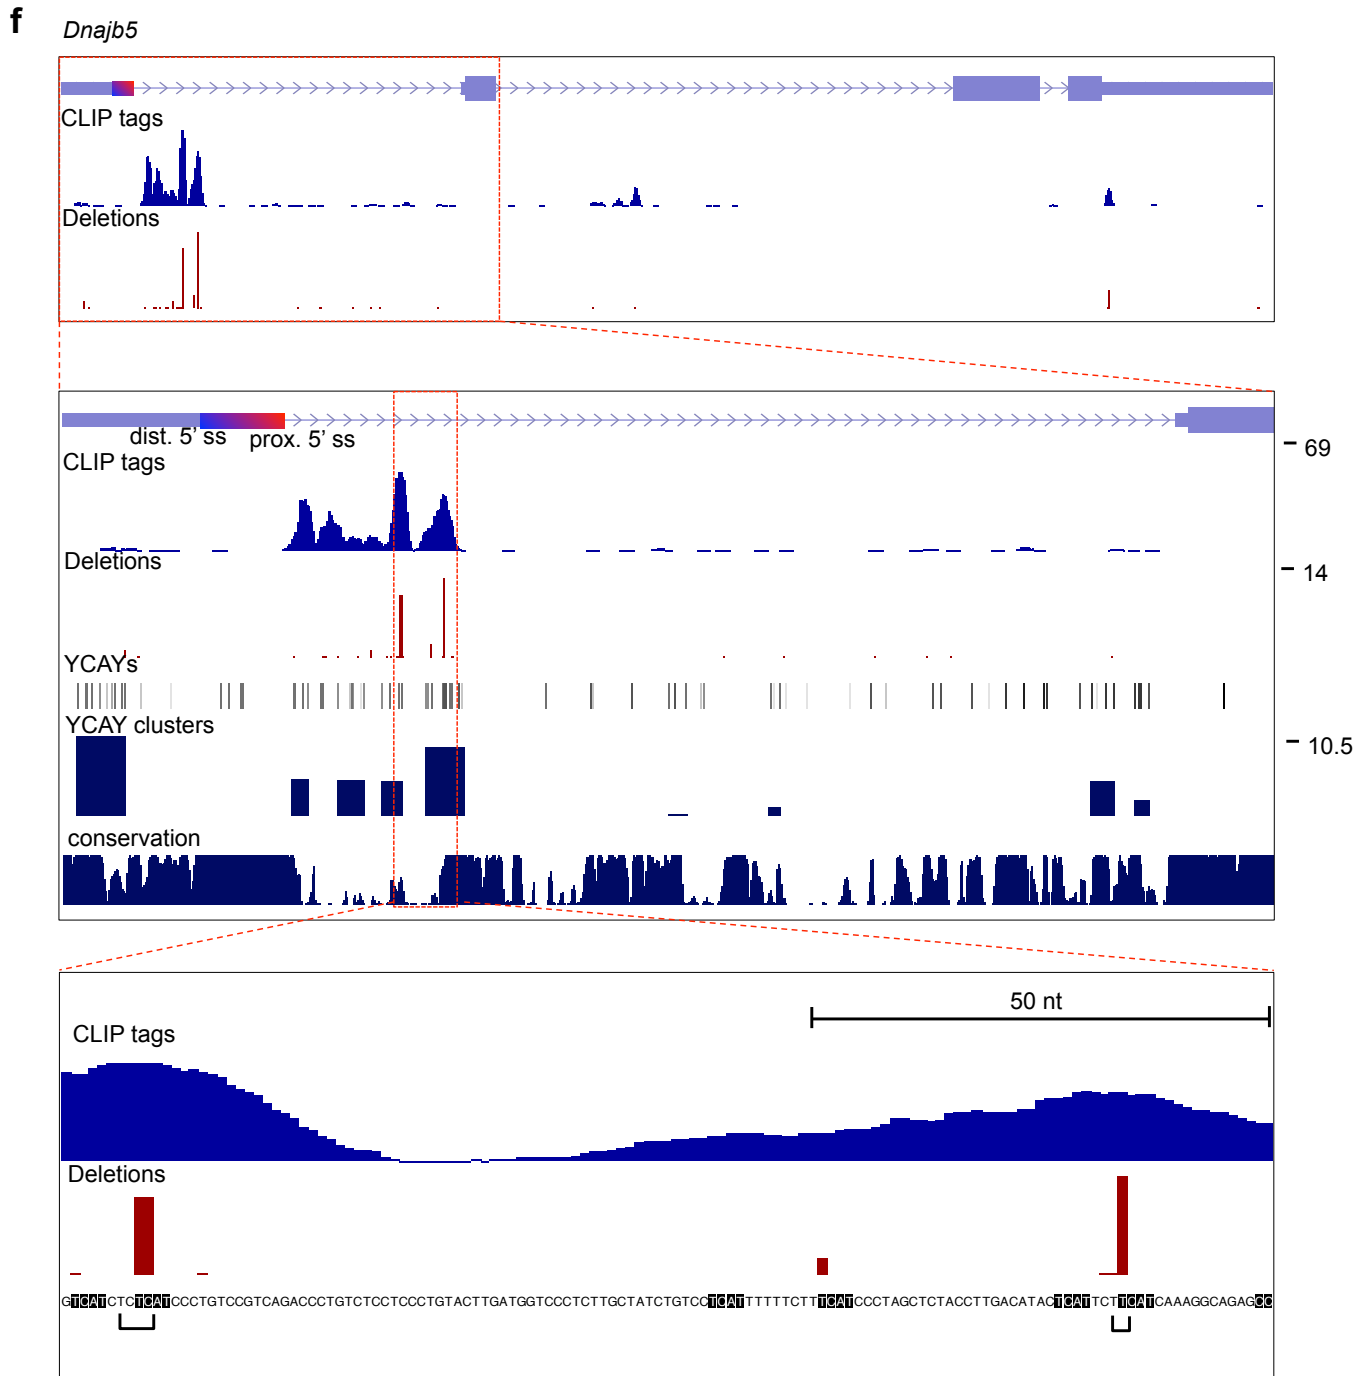

**Supplementary Figure 2: Additional examples of Nova CIMS nearby validated Nova-regulated alternative exons (continued).**

See Fig. 3d legends in the main text for more details.

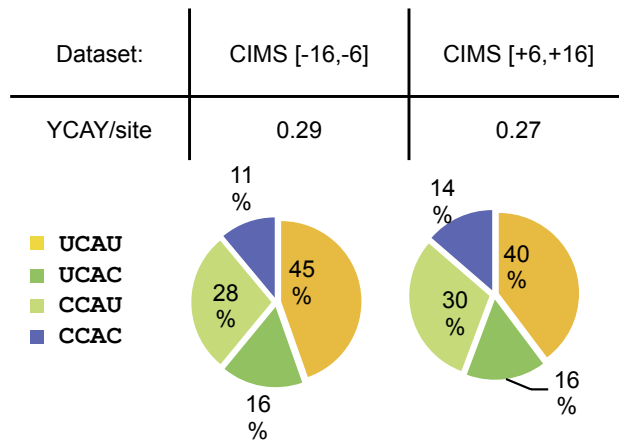

**Supplementary Figure 3: Nova prefers U over C in the first or last position of the YCA<sub>Y</sub> element.**

Supplementary to Fig. 4b in the main text. The overall frequency (top) and composition (bottom) of the four tetramers conforming to the YCA<sub>Y</sub> consensus are shown for 11-nt sequences upstream (-16 to -6 nt) or downstream (6 to 16 nt) of CIMS.

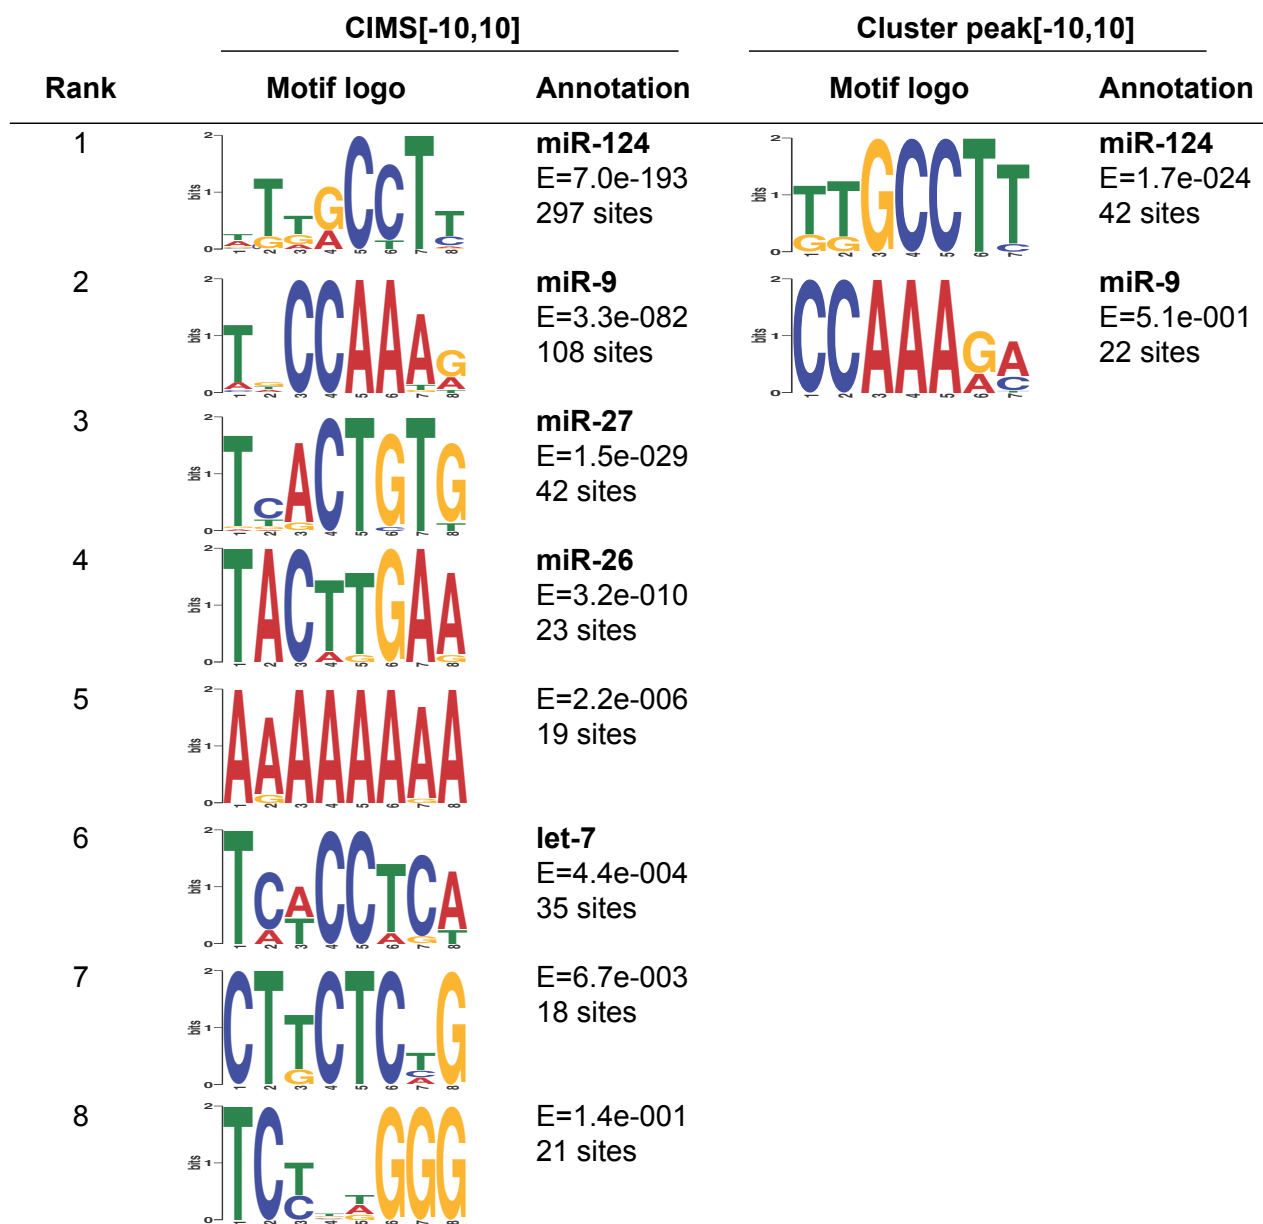

**Supplementary Figure 4: De novo motif analysis of Ago mRNA CIMS data.**

Results obtained from sequences around CIMS (-10 to +10, 21 nt) or CLIP tag cluster peaks (-10 to +10, 21 nt) are compared. Only motifs with E-value < 1 are considered significant and shown here. The number of sites and E-value for each motif are indicated, together with the identity of miRNAs, when available.

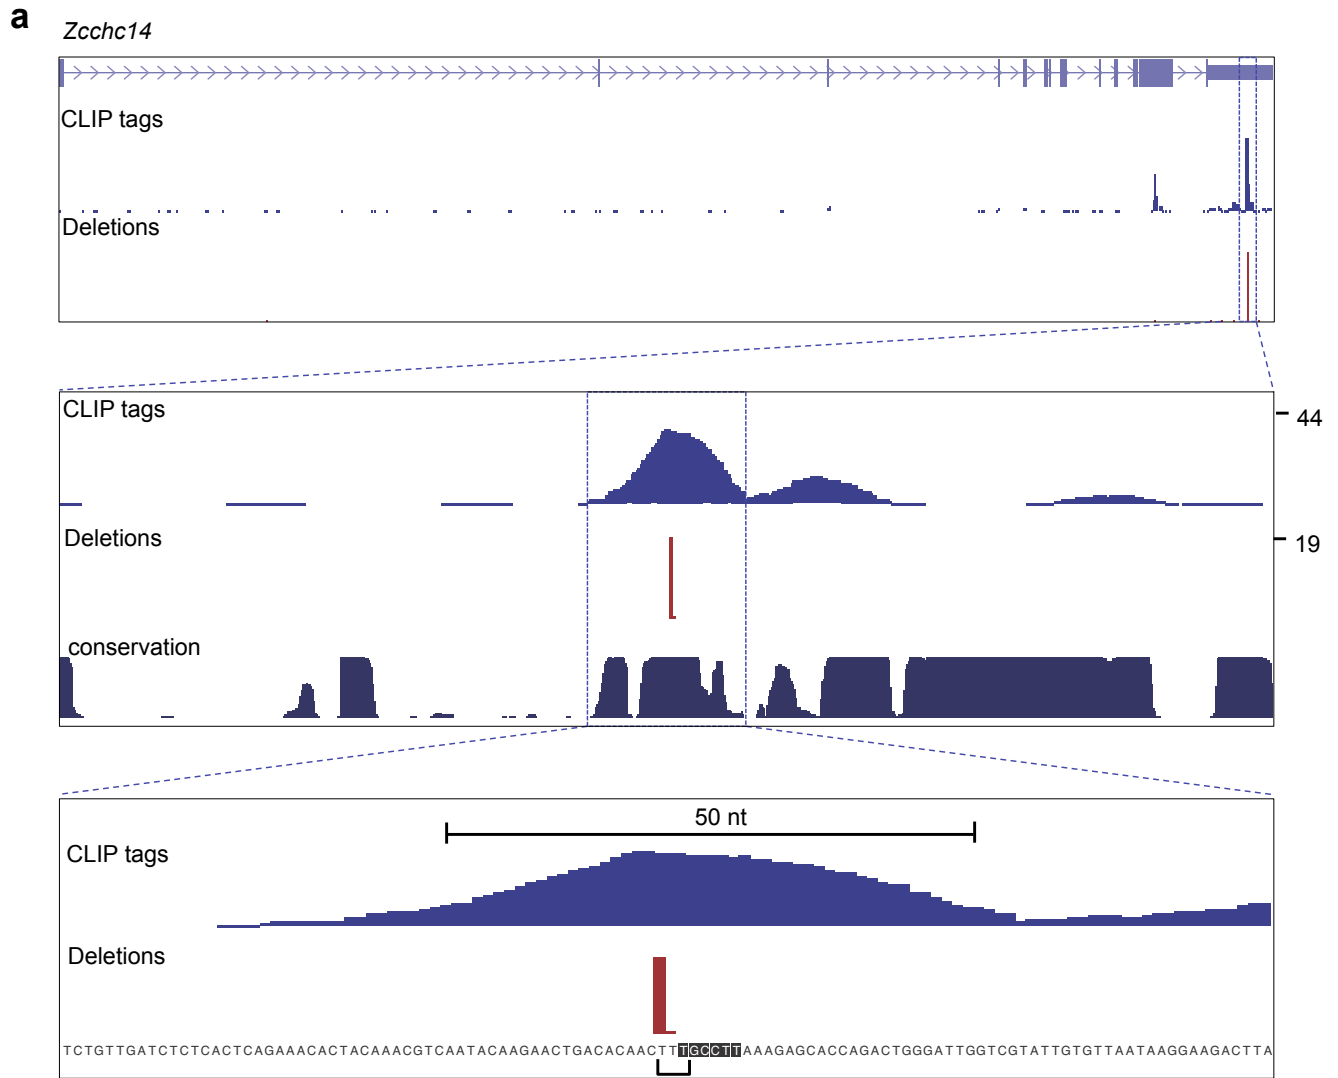

**Supplementary Figure 5: Examples of Ago CIMS with nearby miR-124 seed matches.**

Top panel: the gene locus, with the number of CLIP tags and frequency of deletions shown in blue and red, respectively. Middle panel: a zoom-in view of sequences around the CIMS. In addition to CLIP tags and deletions, cross-species sequence conservation in mammals is shown. Bottom panel: A further zoom-in view of sequences around the CIMS. The miR-124 seed match (GUGCCUU or UGCCUU) is highlighted.

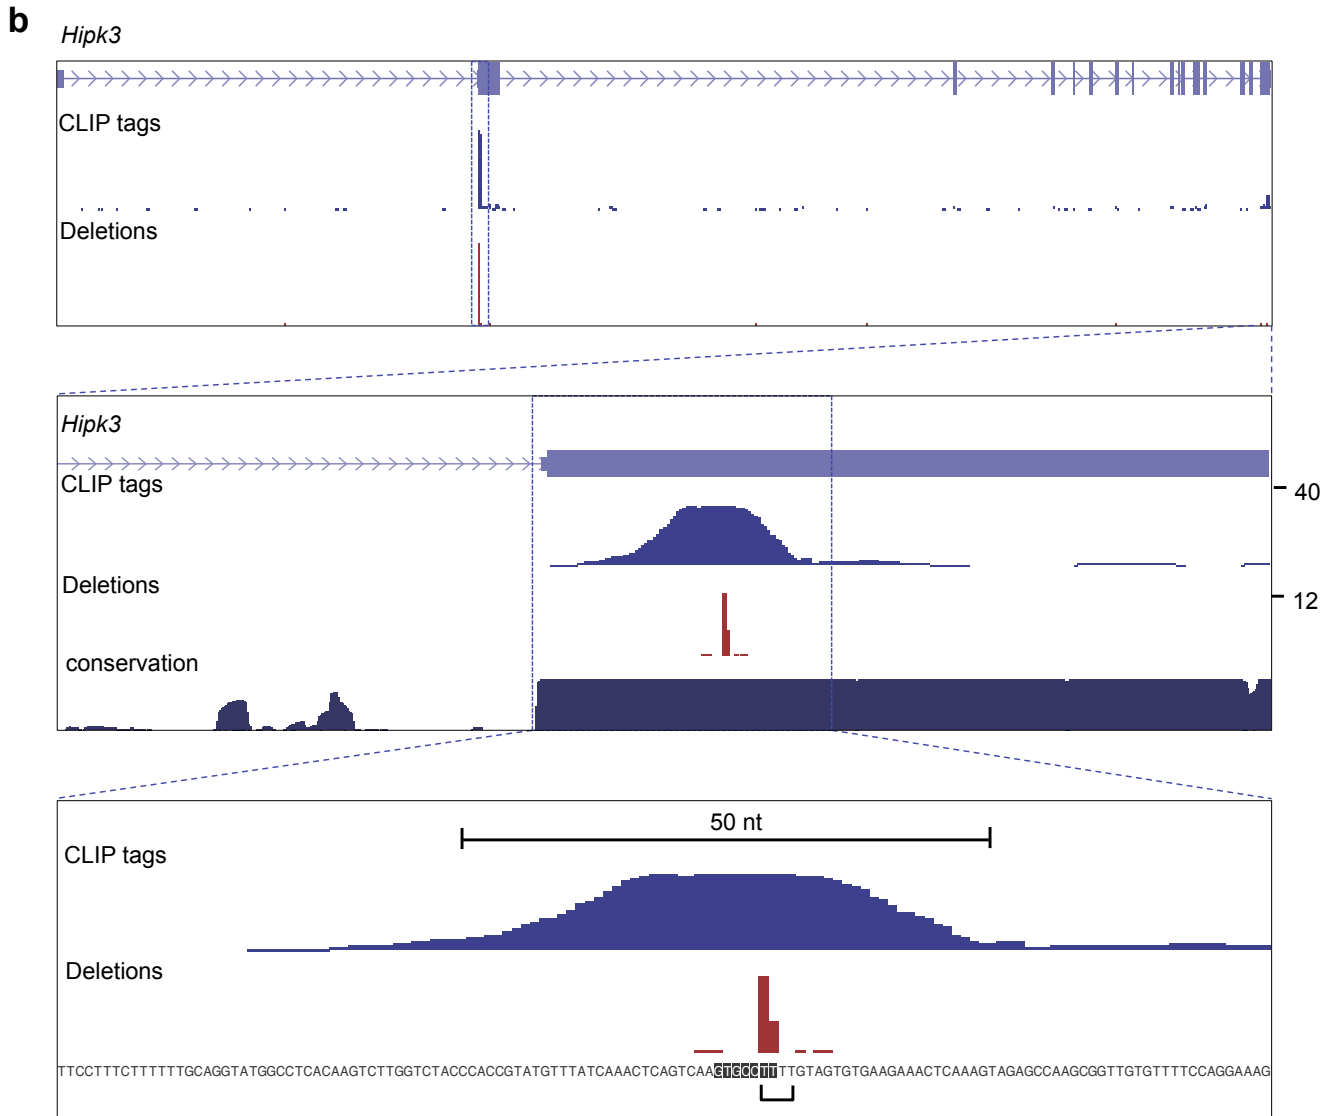

**Supplementary Figure 5: Examples of Ago CIMS with nearby miR-124 seed matches (continued).**

Top panel: the gene locus, with the number of CLIP tags and frequency of deletions shown in blue and red, respectively. Middle panel: a zoom-in view of sequences around the CIMS. In addition to CLIP tags and deletions, cross-species sequence conservation in mammals is shown. Bottom panel: A further zoom-in view of sequences around the CIMS. The miR-124 seed match (GUGCCUU or UGCCUU) is highlighted.

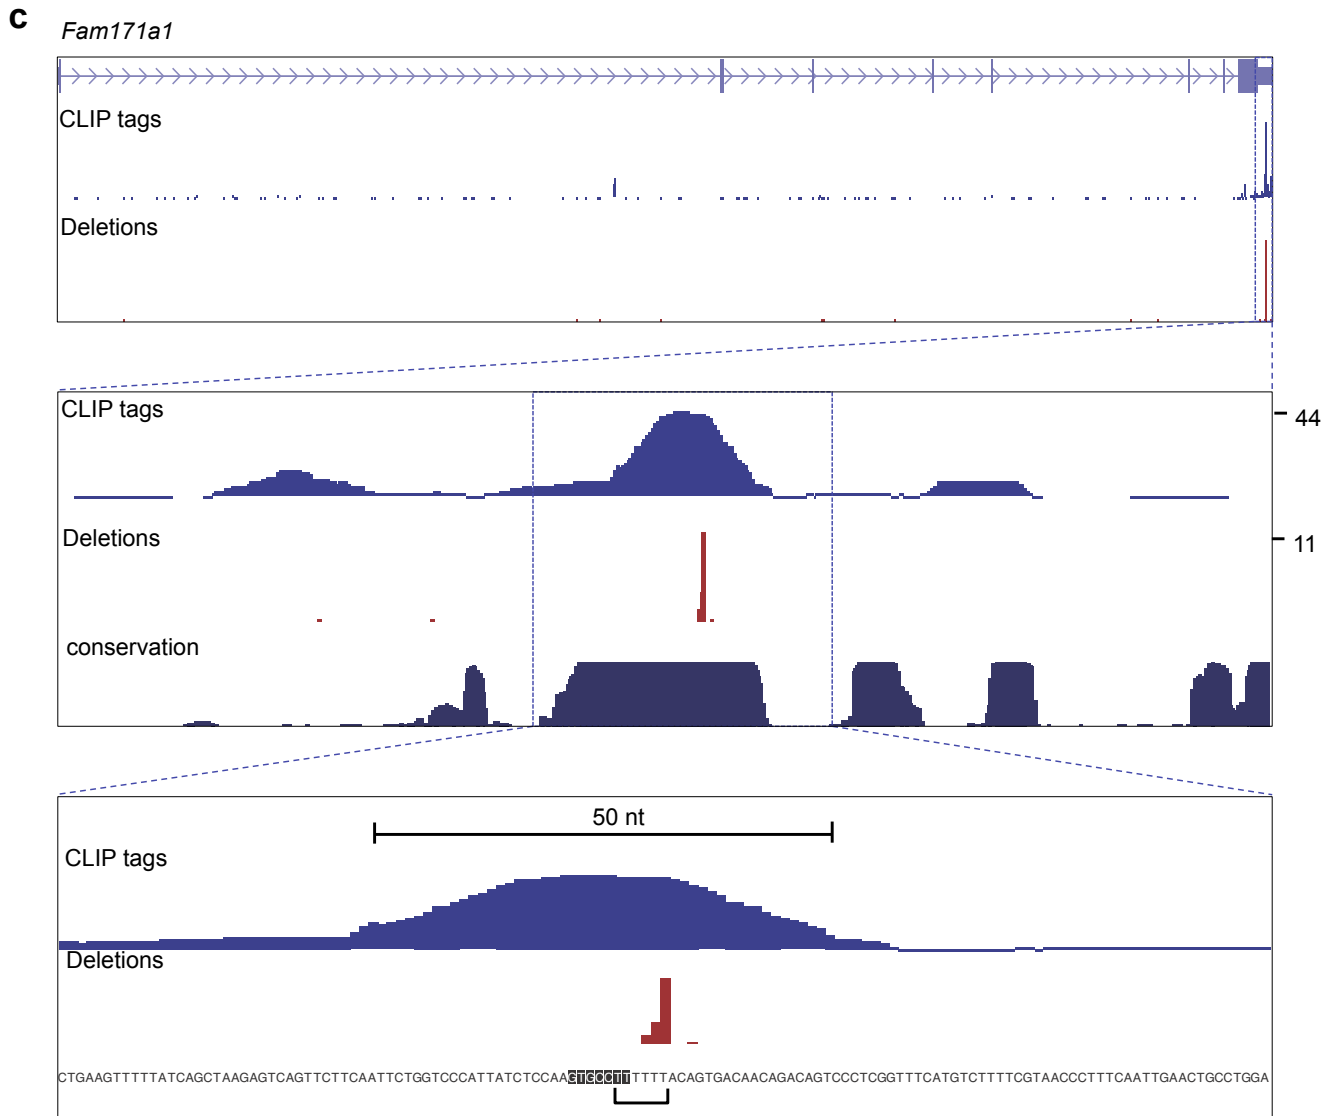

**Supplementary Figure 5: Examples of Ago CIMS with nearby miR-124 seed matches (continued).**

Top panel: the gene locus, with the number of CLIP tags and frequency of deletions shown in blue and red, respectively. Middle panel: a zoom-in view of sequences around the CIMS. In addition to CLIP tags and deletions, cross-species sequence conservation in mammals is shown. Bottom panel: A further zoom-in view of sequences around the CIMS. The miR-124 seed match (GUGCCUU or UGCCUU) is highlighted.

**d***Elovl5*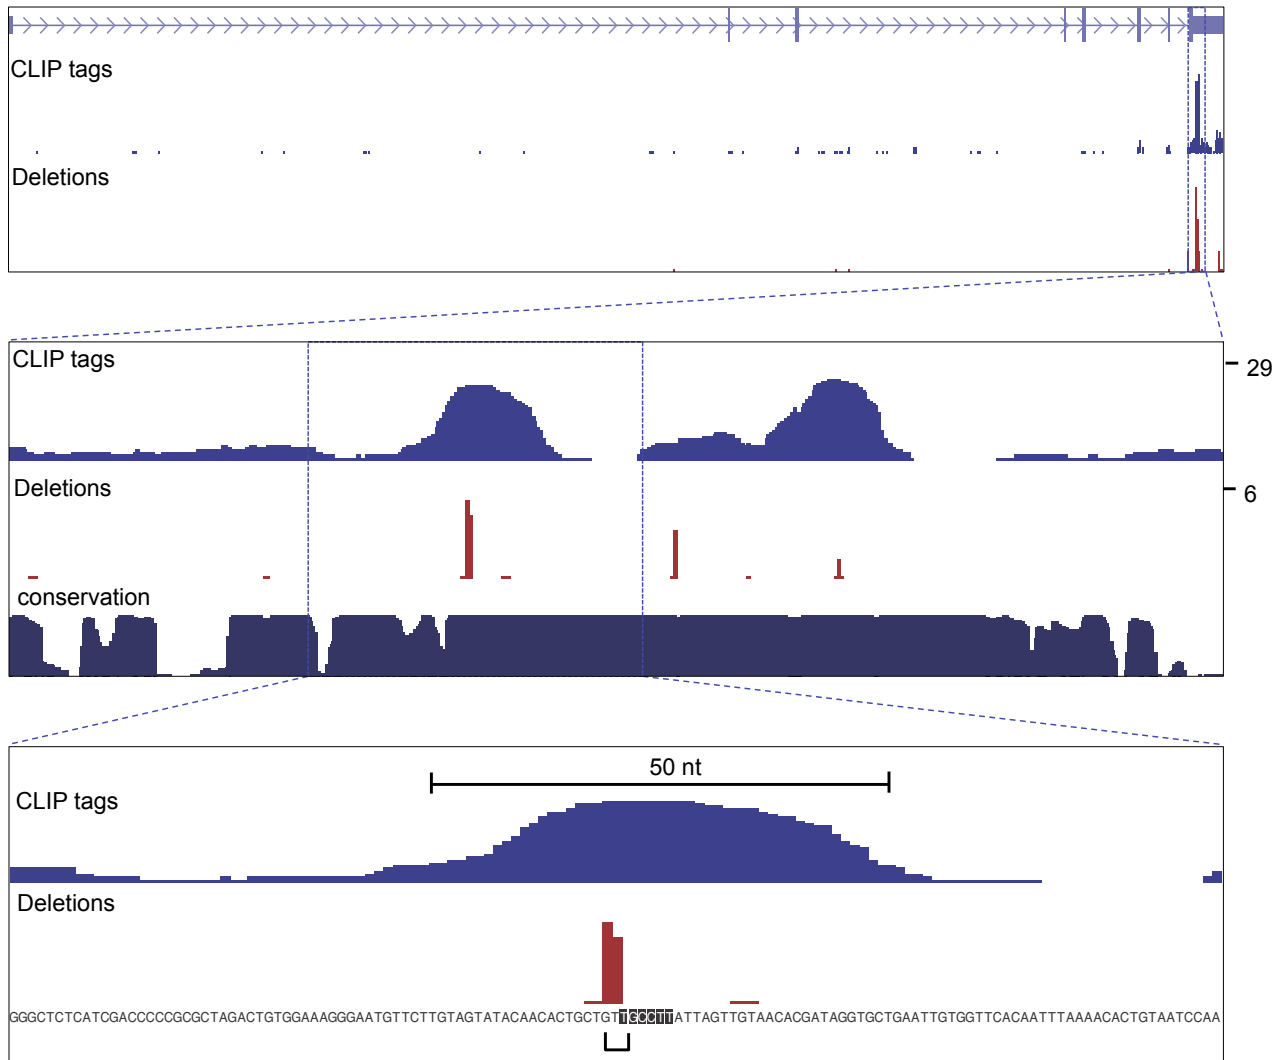

**Supplementary Figure 5: Examples of Ago CIMS with nearby miR-124 seed matches (continued).**

Top panel: the gene locus, with the number of CLIP tags and frequency of deletions shown in blue and red, respectively. Middle panel: a zoom-in view of sequences around the CIMS. In addition to CLIP tags and deletions, cross-species sequence conservation in mammals is shown. Bottom panel: A further zoom-in view of sequences around the CIMS. The miR-124 seed match (GUGCCUU or UGCCUU) is highlighted.

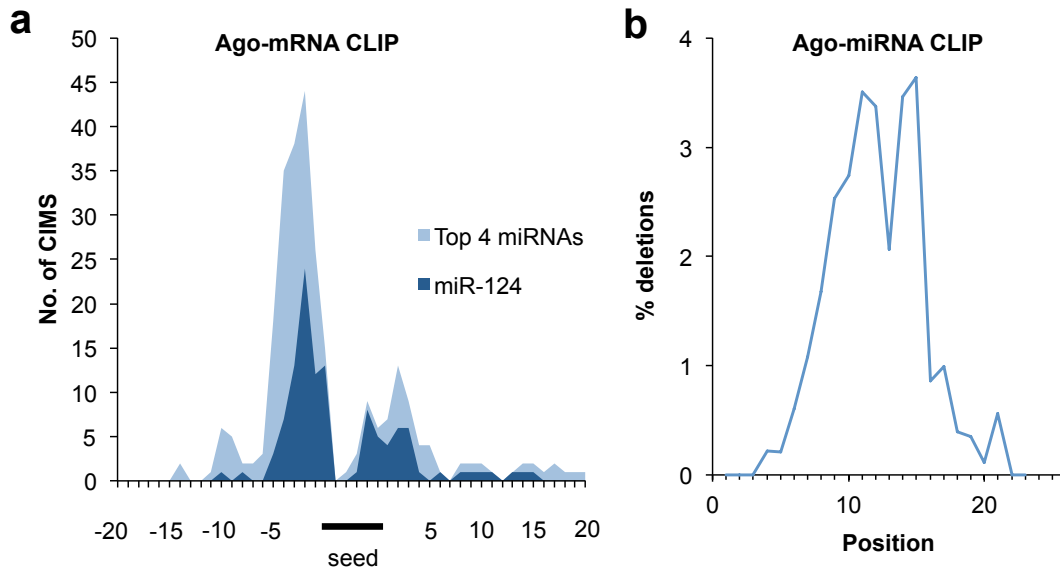

**Supplementary Figure 6: Distribution of Ago cross-linking induced mutations on mRNAs relative to miRNA seed matches and miRNAs.**

**a.** The frequency of CIMS in Ago-mRNA CLIP data is plotted relative to miRNA seed matches. The light and dark blue curves represent the top 4 miRNAs (miR-124, miR-9, let-7, and miR-26) pooled together or miR-124 alone.

**b.** The overall positional frequency of deletions in miRNAs with all miRNAs pooled together.
